# Supplementary material for: Chitosan-poly(m-phenylenediamine) membranes for efficient gold recovery from acidic aqueous solutions
Source: Royal Society of Chemistry journal article supplement (doi:10.1039/d2nj04659h), 2022-01-01
Supplement: d2nj04659h1.pdf [file d2nj04659h1.pdf]

## Supplementary data

### Chitosan-poly(m-phenylenediamine) membrane for efficient gold recovery from acidic aqueous solution

Zhongmin Feng, Chuanyu Zhu, Yupu Meng and Zhuqing Wang\*

Anhui Key Laboratory of Photoelectric-Magnetic Functional Materials, Anqing

Normal University, Anqing 246133, China

**\* Corresponding Author:**

Zhuqing Wang. Tel./fax: +86-556-5708025. Address: Anhui Key Laboratory of Photoelectric-magnetic functional materials, Anqing Normal University, Anqing 246133, China. E-mail address: wangzhuqing@vip.163.com (Z. W).

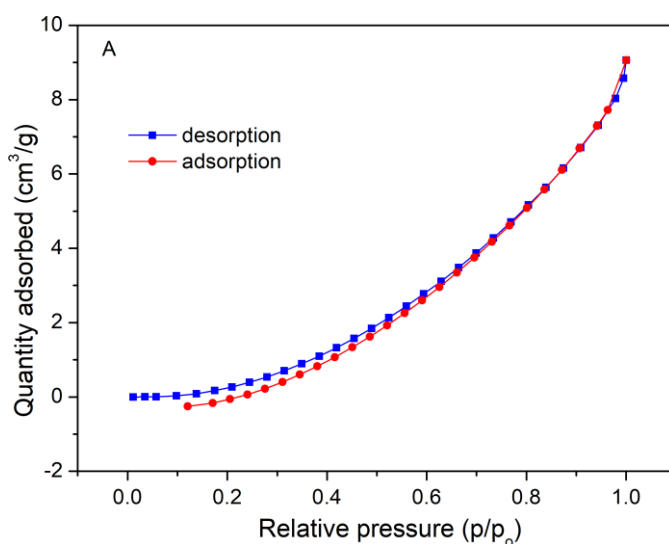

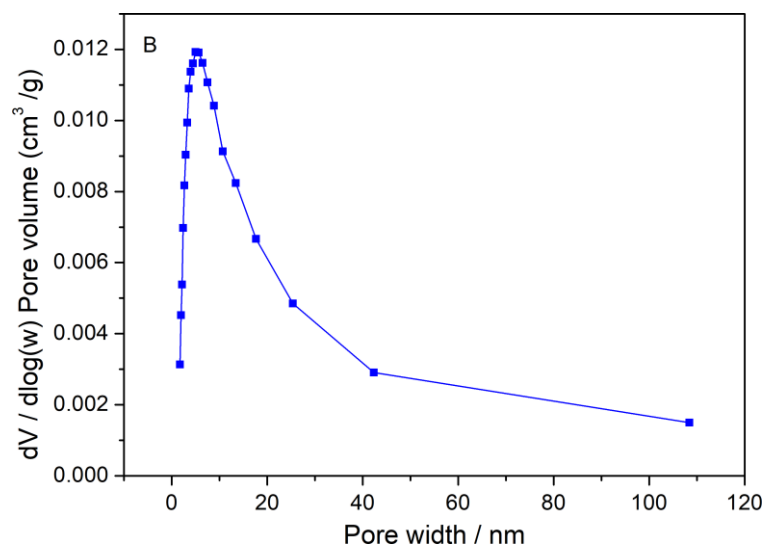

**Fig. S1** (A) N<sub>2</sub> adsorption-desorption isotherm and (B) pore width distribution of CS/PmPD membrane.

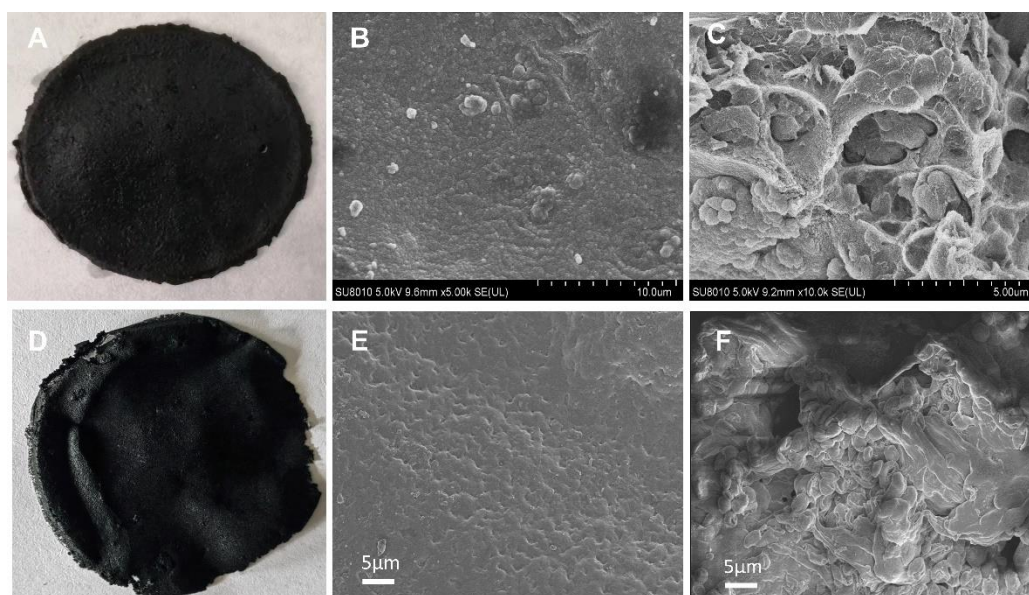

**Fig. S2** (A) Digital photo of CS/PmPD membrane before adsorption; SEM images of (B) surface and (C) cross-section of the CS/PmPD membrane; (D) Digital photo of CS/PmPD membrane after four adsorption/desorption cycles; SEM images of (E) surface and (F) cross-section of the CS/PmPD membrane after four adsorption/desorption cycles.

**Table S1.** Adsorption capacity of different materials for Au(III).

| <b>Materials</b>       | <b>Temperature (K)</b> | <b>pH</b> | <b>Adsorption capacity for Au(III) (mg/g)</b> | <b>Refs.</b> |
|------------------------|------------------------|-----------|-----------------------------------------------|--------------|
| Clay minerals          | 298                    | 4         | 108.3                                         | 10           |
| Amberjet™ 4200         | 298                    | 5         | 164.4                                         | 25           |
| AT-A2 proteins         | 323                    | 5         | 285.7                                         | 26           |
| DAVF-PT                | 298                    | 2         | 528                                           | 27           |
| NH <sub>2</sub> -ZIF-8 | 298                    | 3         | 357                                           | 28           |
| APS-LCP                | 298                    | 4         | 261.4                                         | 29           |
| CysR                   | 298                    | 2.6       | 714.3                                         | 30           |
| Silica gel             | 298                    | 2.5       | 459                                           | 31           |
| MOFs                   | 298                    | 1         | 495                                           | 32           |
| GH-D-P                 | 303                    | 3         | 357.2                                         | 33           |
| UiO-66-TU              | 298                    | 7         | 495                                           | 34           |
| CDF-CS                 | 298                    | 7         | 478.4                                         | 12           |
| JNU-1                  | 298                    | 2 M HCl   | 1124                                          | 35           |
| PTB                    | 310                    | 2.8       | 2244                                          | 36           |
| PTL                    | 333                    | 3         | 1034                                          | 37           |
| Fe-BTC/PpPDA           | 298                    | 2-11      | 934                                           | 38           |
| GA-CS                  | 298                    | -         | 500                                           | 39           |
| DAVFs-CS               | 298                    | 2         | 322                                           | 40           |
| CS/PmPD                | 298                    | 3         | 410                                           | Our work     |

Table S2 shows the unit-price of raw materials employed in preparation of the CDF-CS, Cu-TFT-Him, and CS/PmPD membrane. Table S3 shows the cost of the used adsorbent to recover 500 mg of gold from the solution. Assuming that the conversion rate of the reaction is 50%, the products of CDF-CS and Cu-TFT-Him are 400 mg and 43 mg, respectively. Based on calculations, the amount of the used adsorbent to recover 500 mg of gold from the same solution is 1.05 g of CDF-CS (\$ 0.603), 0.65 g of Cu-TFT-Him (\$ 6.440), and 1.22 g of CS/PmPD (\$ 0.161), respectively.

**Table S2** The selling price of raw materials required for the preparation of adsorbents

| CS/PmPD                                                       | Dosage | unit-price<br>\$/ kg(L) | Cu-TFT-Him                                          | Dosage  | unit-price<br>\$/ kg(L) | CDF-CS                                                       | Dosage | unit-price<br>\$/ kg(L) |
|---------------------------------------------------------------|--------|-------------------------|-----------------------------------------------------|---------|-------------------------|--------------------------------------------------------------|--------|-------------------------|
| mPD                                                           | 1.0 g  | 27.90                   | DMF                                                 | 10 mL   | 23.60                   | FeCl <sub>3</sub> ·6H <sub>2</sub> O                         | 2.7 g  | 9.58                    |
| (NH <sub>4</sub> ) <sub>2</sub> S <sub>2</sub> O <sub>8</sub> | 2.3 g  | 13.50                   | C <sub>3</sub> H <sub>5</sub> N                     | 1 mL    | 69.20                   | FeCl <sub>2</sub> ·4H <sub>2</sub> O                         | 1.0 g  | 297.20                  |
| CS                                                            | 0.5 g  | 40.20                   | Cu(NO <sub>3</sub> ) <sub>2</sub> ·H <sub>2</sub> O | 0.036 g | 624.70                  | CS                                                           | 1.93 g | 40.20                   |
| C <sub>4</sub> H <sub>6</sub> O <sub>6</sub>                  | 0.4 g  | 8.10                    | CH <sub>3</sub> OH                                  | 25 mL   | 9.58                    | C <sub>4</sub> H <sub>12</sub> N <sub>2</sub> S <sub>2</sub> | 1.35 g | 52.50                   |
| C <sub>2</sub> H <sub>5</sub> OH                              | 20 mL  | 16.40                   | C <sub>8</sub> F <sub>4</sub> N <sub>2</sub>        | 0.12 g  | 820.80                  | C <sub>2</sub> H <sub>4</sub> O <sub>2</sub>                 | 200 mL | 138.75                  |
| [EMIM]Ac                                                      | 2 mL   | 657.60                  |                                                     |         |                         | C <sub>2</sub> H <sub>5</sub> OH                             | 40 mL  | 16.40                   |
|                                                               |        |                         |                                                     |         |                         | CH <sub>3</sub> OH                                           | 25 mL  | 9.58                    |

**Table S3** The cost of the used adsorbent to recover 500 mg of gold

| Adsorbent  | Dosage / g | Cost / \$ |
|------------|------------|-----------|
| CS/PmPD    | 1.22       | 0.161     |
| Cu-TFT-Him | 0.65       | 6.440     |
| CDF-CS     | 1.05       | 0.603     |

## References

- N. Cheng, B. Wang, P. Wu, X. Lee, Y. Xing, M. Chen and B. Gao, *Environ. Pollut.*, 2021, **273**, 116448.
- M. Zhao, J. Zhao, Z. Huang, S. Wang and L. Zhang, *Int. J. Biol. Macromol.*, 2019, **137**, 721-731.
- J. W. Choi, M. H. Song, J. K. Bediako and Y. S. Yun, *Environ. Pollut.*, 2020, **266**, 115167.
- Y. L. Han, J. H. Wu, C. L. Cheng, D. Nagarajan, C. R. Lee, Y. H. Li and J. S. Chang, *Bioresour. Technol.*, 2017, **239**, 160-170.
- F. Liu, S. Wang and S. Chen, *Int. J. Biol. Macromol.*, 2020, **152**, 1242-1251.
- S. Zhou, C. Hu, W. Xu, X. Mo, P. Zhang, Y. Liu and K. Tang, *Appl. Organomet. Chem.*, 2020, **34**, e5541.
- N. Saman, M. U. Rashid, J. Lye and H. Mat, *React. Funct. Polym.*, 2017, **123**, 106-114.
- X. Yang, Q. Pan, Y. Ao, J. Du, Z. Dong, M. Zhai and L. Zhao, *Environ. Sci. Pollut. R.*, 2020, **27**, 38334-38343.
- Y. Zhang, R. Qu, T. Xu, Y. Zhang, C. Sun, C. Ji and Y. Wang, *Front. Chem.*, 2019, **7**, 577.
- S. Lin, D. H. Kumar Reddy, J. K. Bediako, M. H. Song, W. Wei, J. A. Kim and Y. S. Yun, *J. Mater. Chem. A*, 2017, **5**, 13557-13564.
- W. Liu, P. Yin, X. Liu, X. Dong, J. Zhang and Q. Xu, *Chem. Eng. Res. Des.*, 2013, **91**, 2748-2758.
- X. Chao, S. X. Wang, L. B. Zhao, Y. Li, Y. Yang and J. H. Peng, *Polymers*, 2018, **10**, 159.
- H. L. Qian, F. L. Meng, C. X. Yang and X. P. Yan, *Angew. Chem. Int. Ed.*, 2020, **132**, 17760-17766.
- Q. Yang, J. Cao, F. Yang, Y. Liu, M. Chen, R. Qin and P. Yang, *Chem. Eng. J.*, 2021, **416**, 129066.
- F. Yang, Z. Yan, J. Zhao, S. Miao, D. Wang and P. Yang, *J. Mater. Chem. A*, 2020, **8**, 3438-3449.
- D. T. Sun, N. Gasilova, S. Yang, E. Oveisi and W. L. Queen, *J. Am. Chem. Soc.*, 2018, **140**, 16697-16703.
- S. I. Park, I. S. Kwak, S. W. Won and Y. S. Yun, *J. Hazard. Mater.*, 2013, **248**, 211-218.
- F. Liu, S. Hua, L. Zhou and B. Hu, *Int. J. Biol. Macromol.*, 2021, **173**, 457-466.
